# Supplementary material
Source: publisher figshare collection journal article supplement (https://acs.figshare.com/ndownloader/files/7809187)
Supplement: Supplementary file 1 [file 7809187]

## **Supporting Information**

### **Thermal safety assessment through the concept of structure-reactivity: application to vegetable oils valorization.**

Sébastien Leveneur<sup>1,2</sup>

<sup>1</sup>*Normandie Univ, INSA Rouen, UNIROUEN, LSPC, EA4704, 76000 Rouen, France.*

*E-mail : [sebastien.leveneur@insa-rouen.fr](mailto:sebastien.leveneur@insa-rouen.fr); fax: +33 2 32 95 66 52.*

<sup>2</sup>*Laboratory of Industrial Chemistry and Reaction Engineering, Johan Gadolin Process Chemistry Centre, Åbo Akademi University, Biskopsgatan 8, FI-20500 Åbo/Turku, Finland.*

## SI1 Determination of TMR<sub>ad</sub>

During ARSST experiment, an electrical heating rate is applied to the reaction mixture. Thus, the energy balance for the reaction mixture can be expressed as:<sup>88-89</sup>

$$m_R \cdot \hat{C}_{PR} \cdot \frac{dT_p}{dt} = q_r(T_p) + q_{\text{electrical}} \quad (\text{S1})$$

where  $q_{\text{electrical}}$  is the electrical power provided by the system.

The electrical power varies with the reaction temperature to provide a constant temperature ramp to the reaction temperature until the onset temperature.

During the first part of the experiment, one can neglect the heat-flow rate due to the chemical reactions  $q_r(T_p)$ , because the temperature increase is mainly due to the electrical power.<sup>89</sup>

From the initial temperature to the so-called onset temperature ( $T_{\text{onset}}$ ), one can determine the value of temperature ramp due to electrical power,  $\beta_{\text{electrical}}$  (Figure S1). Thus, eq S1 becomes

$$\begin{aligned} \frac{dT_p}{dt} &= \frac{q_r(T_p)}{m_R \cdot \hat{C}_{PR}} + \frac{q_{\text{electrical}}}{m_R \cdot \hat{C}_{PR}} \\ &= \frac{q_r(T_p)}{m_R \cdot \hat{C}_{PR}} + \beta_{\text{electrical}} \end{aligned} \quad (\text{S2})$$

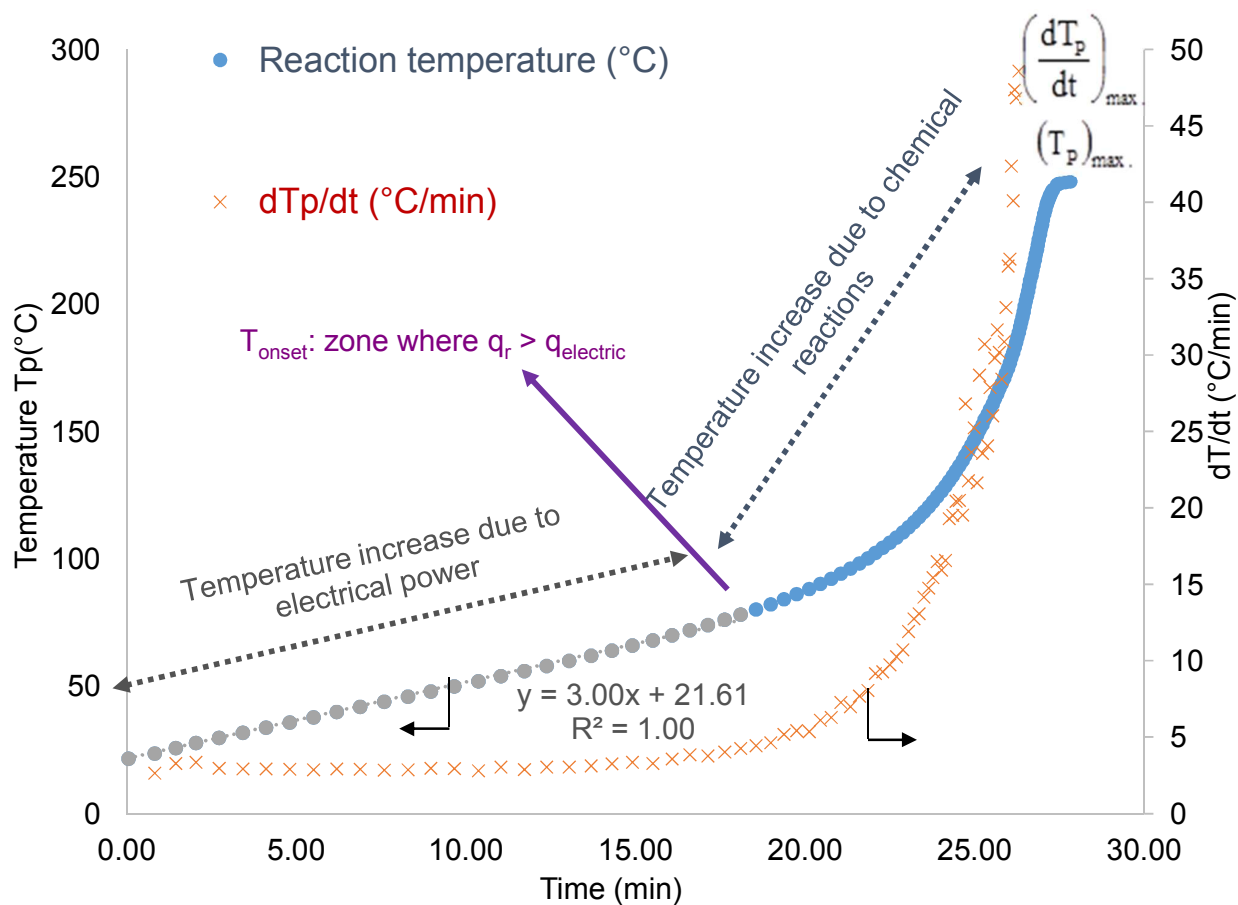

Figure S1. Temperature profile during an ARSST experiment for the epoxidation of cottonseed oil by performic acid.

TMR<sub>ad</sub> was calculated from T<sub>onset</sub> to  $\left(\frac{dT_p}{dt}\right)_{\max}$ .

The heat-flow rate released by chemical reactions  $q_r(T_p)$  at a temperature  $T_p$  can be expressed as

$$q_r(T_p) = -R \cdot \Delta H_R \cdot V_R \quad (S3)$$

where,  $R$  ( $\text{mol} \cdot \text{L}^{-1} \cdot \text{s}^{-1}$ ) is the reaction rate,  $\Delta H_R$  (kJ/mol) is the reaction enthalpy and  $V_R$  is the reaction mixture volume.

The detailed kinetics and thermodynamics of this system can be time-consuming, and then the zero-order approach was used, which is largely adopted by the process safety community.

Eq S3 becomes

$$q_r(T_p) = -k(T_p) \Delta H_R \cdot V_R \quad (S4)$$

where,  $k(T_p)$  is the rate constant for a zero-order kinetics at  $T_p$ .

The evolution of the rate constant with temperature can be expressed by a modified Arrhenius equation as:

$$k(T_p) = k(T_{ref}) \cdot \exp\left(\frac{-E_a}{R} \left(\frac{1}{T_p} - \frac{1}{T_{ref}}\right)\right) \quad (S5)$$

where,  $k(T_{ref}) = Ae^{-\left(\frac{E_a}{RT_{ref}}\right)}$  is the rate constant at a reference temperature  $T_{ref}$ ,  $A$  is the pre-exponential factor,  $E_a$  the activation energy and  $R$  is the gas constant.

In the ARSST system, by considering the temperature from  $T_{onset}$  to  $\left(\frac{dT_p}{dt}\right)_{max}$ , one can

neglect the term  $\beta_{electrical}$  in eq S2. By adding eqs S4 and S5 into S2, one gets

$$\begin{aligned} \frac{dT_p}{dt} &= \frac{q_r(T_p)}{m_R \cdot \hat{C}_{PR}} \\ &= \frac{-k(T_p) \Delta H_R \cdot V_R}{m_R \cdot \hat{C}_{PR}} \\ &= \frac{-\Delta H_R \cdot V_R}{m_R \cdot \hat{C}_{PR}} \cdot k(T_{ref}) \cdot \exp\left(\frac{-E_a}{R} \left(\frac{1}{T_p} - \frac{1}{T_{ref}}\right)\right) \\ &= \frac{q_r(T_{ref})}{m_R \cdot \hat{C}_{PR}} \cdot \exp\left(\frac{-E_a}{R} \left(\frac{1}{T_p} - \frac{1}{T_{ref}}\right)\right) \end{aligned} \quad (S6)$$

where,  $q_r(T_{ref}) = k(T_{ref}) \Delta H_R \cdot V_R$ , which represents the heat-flow rate at the reference temperature by using the zero-order approach.

The integration of eq S6 from  $T_{\text{onset}}$  to the temperature  $T_{\text{pmax}}$ , which is the temperature at

$\left(\frac{dT_p}{dt}\right)_{\text{max}}$  gives

$$\begin{aligned} \frac{dT_p}{dt} &= \frac{q_r(T_{\text{ref}})}{m_R \cdot \hat{C}_{PR}} \cdot \exp\left(\frac{-E_a}{R} \cdot \left(\frac{1}{T_p} - \frac{1}{T_{\text{ref}}}\right)\right) \\ \Leftrightarrow \int_{T_{\text{onset}}}^{T_{R\text{max}}} \frac{dT_p}{\exp\left(\frac{E_a}{R} \cdot \left(\frac{1}{T_p} - \frac{1}{T_{\text{ref}}}\right)\right)} &= \int_{t \text{ at } T_{\text{onset}}}^{t \text{ at } T_{R\text{max}}} \frac{q_r(T_{\text{ref}})}{m_R \cdot \hat{C}_{PR}} \cdot dt \end{aligned} \quad (\text{S7})$$

For the sake of simplicity, time at  $T_{\text{onset}}$  was set at zero and time at  $T_{\text{pmax}}$  is the time-to-maximum rate under adiabatic conditions for  $T_{\text{onset}}$ , i.e.,  $\text{TMR}_{\text{ad}}(T_{\text{onset}})$ . Hence, eq S7 becomes

$$\begin{aligned} \left[ \frac{-1}{\frac{E_a}{R \cdot T_p^2}} \cdot \exp\left(\frac{E_a}{R} \cdot \left(\frac{1}{T_p} - \frac{1}{T_{\text{ref}}}\right)\right) \right]_{T_{\text{onset}}}^{T_{R\text{max}}} &= \frac{q_r(T_{\text{ref}})}{m_R \cdot \hat{C}_{PR}} \cdot (\text{TMR}_{\text{ad}}(T_{\text{onset}}) - 0) \\ \Leftrightarrow \frac{-1}{\frac{E_a}{R \cdot T_{R\text{max}}^2}} \cdot \exp\left(\frac{E_a}{R} \cdot \left(\frac{1}{T_{R\text{max}}} - \frac{1}{T_{\text{ref}}}\right)\right) &+ \frac{1}{\frac{E_a}{R \cdot T_{\text{onset}}^2}} \cdot \exp\left(\frac{E_a}{R} \cdot \left(\frac{1}{T_{\text{onset}}} - \frac{1}{T_{\text{ref}}}\right)\right) = \frac{q_r(T_{\text{ref}})}{m_R \cdot \hat{C}_{PR}} \cdot \text{TMR}_{\text{ad}}(T_{\text{onset}}) \end{aligned} \quad (\text{S8})$$

In eq S8, the term  $\frac{-1}{\frac{E_a}{R \cdot T_{R\text{max}}^2}} \cdot \exp\left(\frac{E_a}{R} \cdot \left(\frac{1}{T_{R\text{max}}} - \frac{1}{T_{\text{ref}}}\right)\right)$  is negligible, thus eq S8 can be simplified to

$$\begin{aligned} \frac{1}{\frac{E_a}{R \cdot T_{\text{onset}}^2}} \cdot \exp\left(\frac{E_a}{R} \cdot \left(\frac{1}{T_{\text{onset}}} - \frac{1}{T_{\text{ref}}}\right)\right) &= \frac{q_r(T_{\text{ref}})}{m_R \cdot \hat{C}_{PR}} \cdot \text{TMR}_{\text{ad}}(T_{\text{onset}}) \\ \Leftrightarrow \text{TMR}_{\text{ad}}(T_{\text{onset}}) &= \frac{R \cdot T_{\text{onset}}^2}{E_a} \cdot \frac{m_R \cdot \hat{C}_{PR}}{q_r(T_{\text{ref}}) \cdot \exp\left(\frac{-E_a}{R} \cdot \left(\frac{1}{T_{\text{onset}}} - \frac{1}{T_{\text{ref}}}\right)\right)} = \frac{R \cdot T_{\text{onset}}^2}{E_a} \cdot \frac{m_R \cdot \hat{C}_{PR}}{q_r(T_{\text{onset}})} \end{aligned} \quad (\text{S9})$$

By using the same logic, the determination of  $\text{TMR}_{\text{ad}}$  at any temperature  $T_p$  can be expressed as:

$$\text{TMR}_{\text{ad}}(T_p) = \frac{R \cdot T_p^2}{E_a} \cdot \frac{m_R \cdot \hat{C}_{PR}}{q_r(T_p)} = \frac{R \cdot T_p^2}{E_a} \cdot \frac{m_R \cdot \hat{C}_{PR}}{k(T_p) \Delta H_R \cdot V_R} = \frac{R \cdot T_p^2}{E_a} \cdot \frac{m_R \cdot \hat{C}_{PR}}{q_r(T_{\text{ref}}) \cdot \exp\left(\frac{-E_a}{R} \cdot \left(\frac{1}{T_p} - \frac{1}{T_{\text{ref}}}\right)\right)} \quad (\text{S10})$$

From eq S10, it is possible to extrapolate the  $\text{TMR}_{\text{ad}}$  at different temperature by using the following equation:

$$\begin{aligned}\ln(\text{TMR}_{\text{ad}}(T_p)) &= \ln\left(\frac{m_R \cdot \hat{C}_{pR} \cdot R \cdot T_p^2}{q_r(T_{\text{Ref}})} \cdot \exp\left(\frac{E_a}{R} \cdot \left(\frac{1}{T_p} - \frac{1}{T_{\text{Ref}}}\right)\right)\right) \\ &= \ln\left(\frac{m_R \cdot \hat{C}_{pR} \cdot R \cdot T_p^2}{q_r(T_{\text{Ref}})}\right) - \frac{E_a}{R \cdot T_{\text{Ref}}} + \frac{E_a}{R} \cdot \frac{1}{T_p} \\ &= \text{constant} + \frac{E_a}{R} \cdot \frac{1}{T_p}\end{aligned}\quad (\text{S11})$$

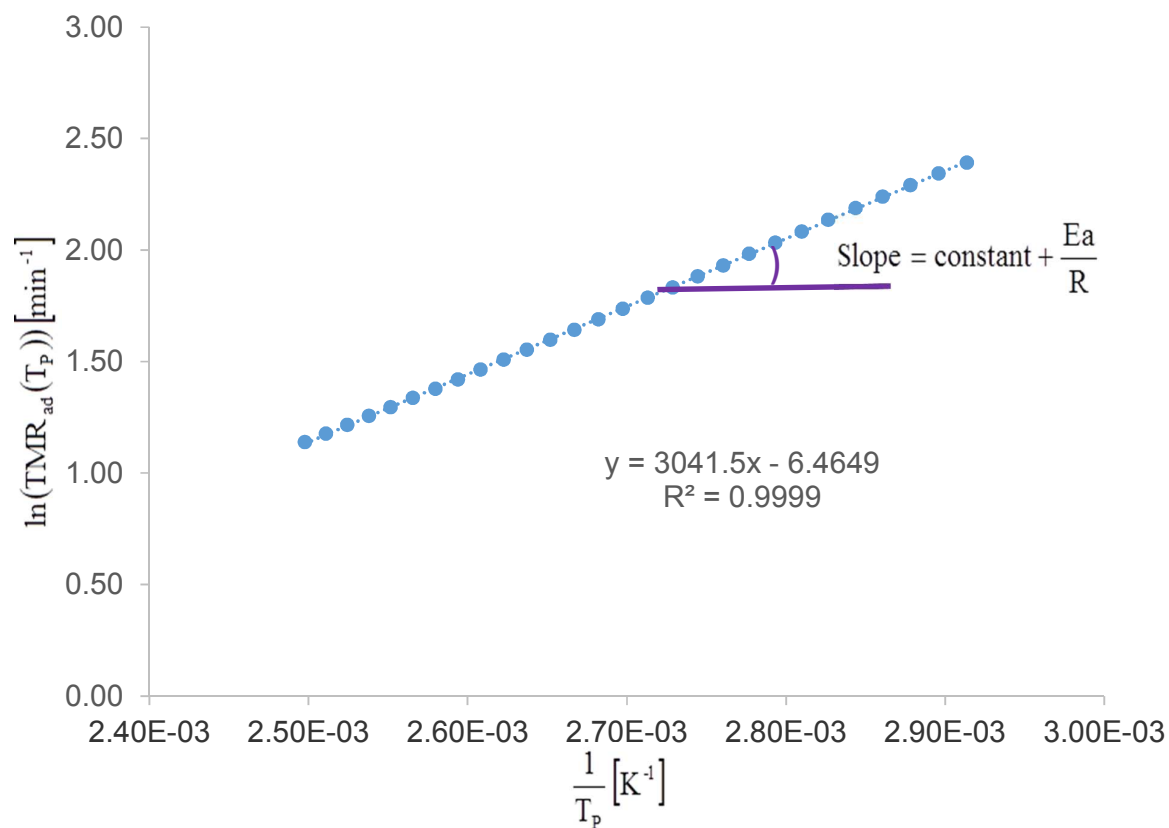

Figure S2 Linear relationships between  $\ln(\text{TMR}_{\text{ad}}(T_p))$  and  $\frac{1}{T_p}$ .

Based on eq S11, it is possible to extrapolate the value of  $TMR_{ad}$  at different process temperature (Figure S2). At industrial scale, the process of epoxidation is carried out within the temperature range 60-80°C. The values of  $TMR_{ad}(T_P)$  at 60 and 80°C were determined by using eq S11. The onset temperature can be higher than 60 or 80°C, for that reason  $TMR_{ad}(T_P=60^{\circ}C)$  and  $TMR_{ad}(T_P=80^{\circ}C)$  were determined by extrapolation.

## -SI2 Effect of stirring and electrical heating

There is a possibility to tune the stirring speed on the ARSST equipment. A first step was to determine the influence of the stirring on the value of  $TMR_{ad}$ .

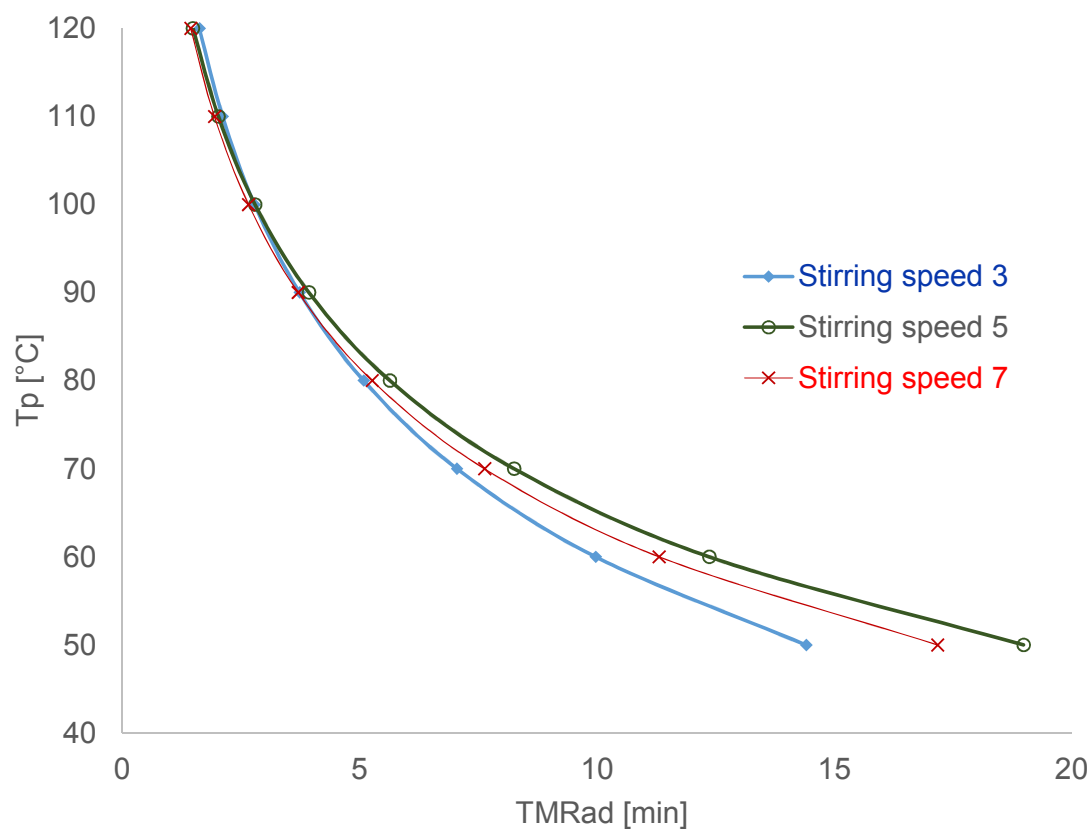

Figure S3. Effect of stirring on the epoxidation of cottonseed oil by performic acid at ca.  $3.4^{\circ}\text{C}/\text{min}$ .

When the stirring speed is higher than 5, one can consider that its effect on  $TMR_{ad}$  is negligible (Figure S3). From Figure S3, one can neglect mass transfer limitation when the stirring speed is between 5 and 7. Thus, all the experiments were performed at a stirring speed of 7.



For ARSST experiments, one should tune the value of the temperature ramp by calibrate the electrical heating rate. To record reliable safety criteria, one should test different temperature ramps.

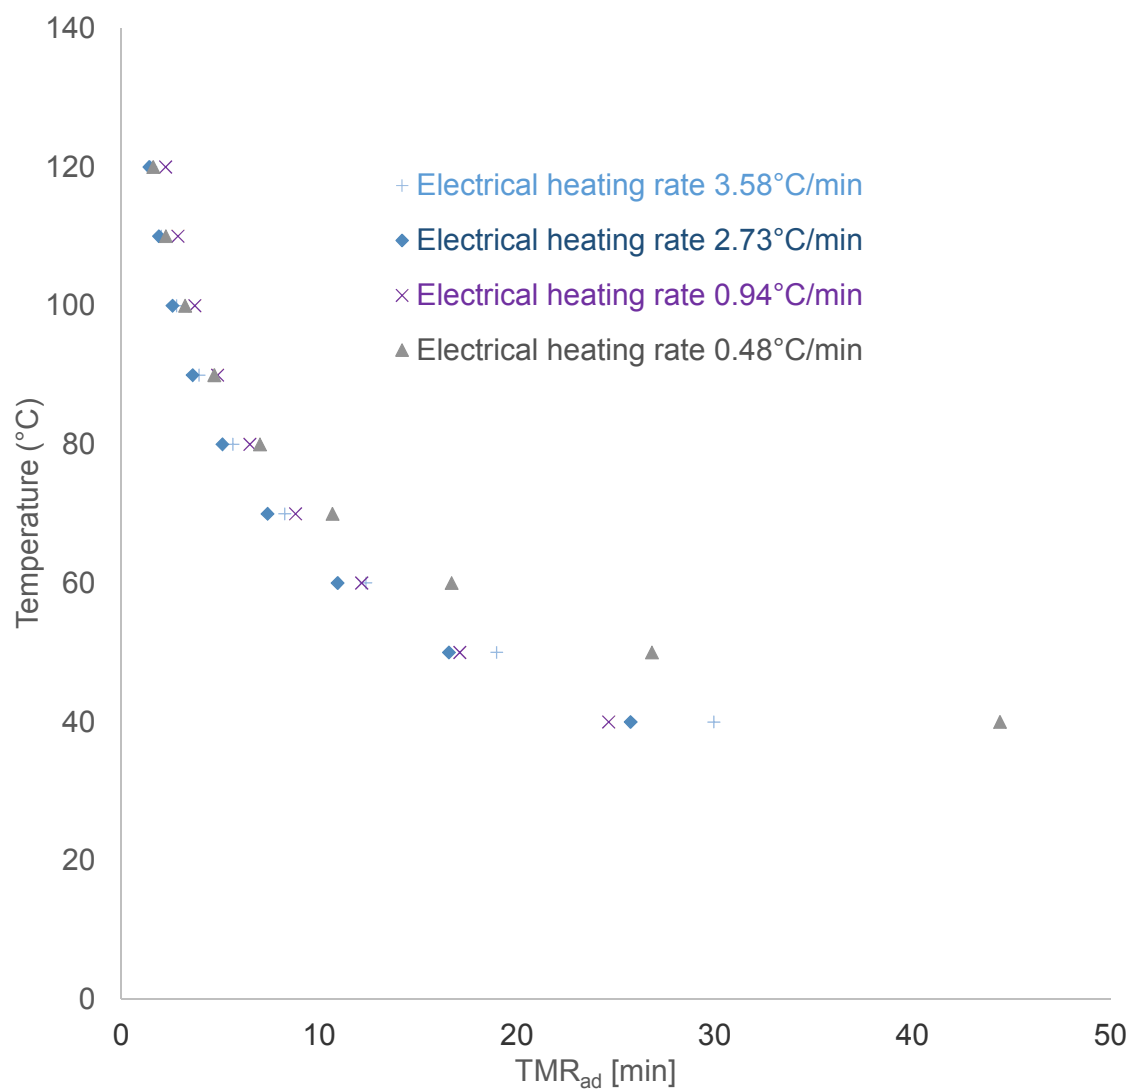

Figure S4. Effect of electrical heating rate on the epoxidation of cottonseed oil by performic acid.

From Figure S4, one can notice that  $\text{TMR}_{\text{ad}}$  values differ significantly for process temperature lower than 60°C. This difference is lower when the process temperature is higher than 60°C. For the ARSST experiments, the value of the temperature ramp was between 2 and 3°C/min.

### -SI3 Long reaction time

As illustrated by Figure S1, several exothermic reactions occur during the epoxidation process. A previous work of our group<sup>38</sup> has shown that one can segregate the exothermicity due to the epoxidation process (perhydrolysis, epoxidation and ring-opening reactions) from the exothermicity due to the decomposition of hydrogen peroxide.

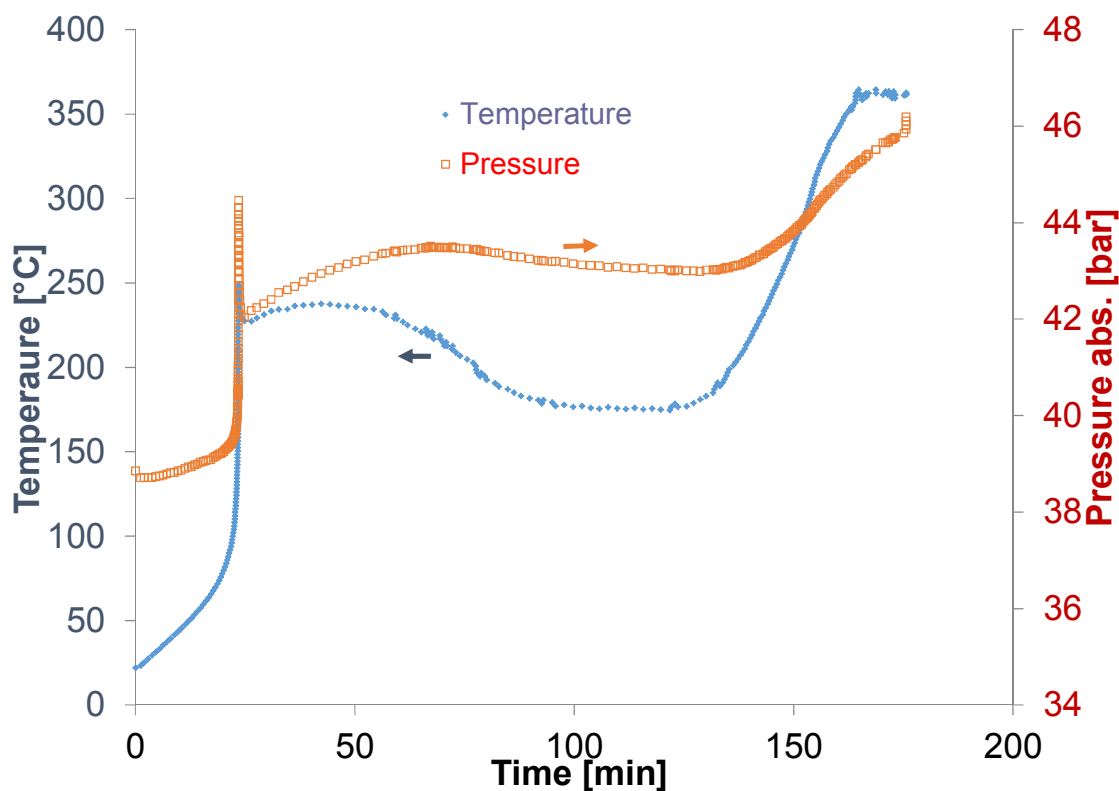

Figure S5. Temperature and pressure behaviour under long reaction time for the epoxidation of cottonseed oil by performic acid at temperature ramp of 2.33°C/min.

By performing reaction on a long time, one can notice the presence of a second decomposition due to the excess of hydrogen peroxide (Figure S5). The first peak is linked to the reactivity of the produced percarboxylic acids. When the first exothermic peak appeared, the electrical heater was switched off.

-SI4 Values of TMR<sub>ad</sub> at 60 and 80°C

Cottonseed oil epoxidation

|                     | Temperature 60          | Temperature 80          |
|---------------------|-------------------------|-------------------------|
| Carboxylic acid     | TMR <sub>ad</sub> [min] | TMR <sub>ad</sub> [min] |
| Formic acid         | 14.36                   | 8.56                    |
| Acetic acid         | 255.86                  | 66.92                   |
| Propionic acid      | 471.81                  | 102.02                  |
| nButyric acid       | 171.51                  | 53.49                   |
| Valeric acid        | 797.59                  | 147.43                  |
| iButyric acid       | 1053.77                 | 180.54                  |
| Lactic acid         | 75.77                   | 25.42                   |
| Hexanoic acid       | 2889.02                 | 468.28                  |
| 2-Ethylbutyric acid | 1512.52                 | 275.63                  |

Olive oil epoxidation

|                     | Temperature 60          | Temperature 80          |
|---------------------|-------------------------|-------------------------|
| Carboxylic acid     | TMR <sub>ad</sub> [min] | TMR <sub>ad</sub> [min] |
| Formic acid         | 11.54                   | 4.66                    |
| Acetic acid         | 181.05                  | 49.67                   |
| Propionic acid      | 1621.66                 | 248.81                  |
| nButyric acid       | 979.07                  | 177.24                  |
| Valeric acid        | 944.96                  | 161.73                  |
| iButyric acid       | 827.27                  | 152.28                  |
| Lactic acid         | 153.31                  | 50.20                   |
| Hexanoic acid       | 5992.14                 | 609.09                  |
| 2-Ethylbutyric acid | 929.26                  | 155.14                  |

### Linseed oil epoxidation

|                     | Temperature 60          | Temperature 80          |
|---------------------|-------------------------|-------------------------|
| Carboxylic acid     | TMR <sub>ad</sub> [min] | TMR <sub>ad</sub> [min] |
| Formic acid         | 8.48                    | 3.82                    |
| Acetic acid         | 216.69                  | 55.82                   |
| Propionic acid      | 743.76                  | 158.35                  |
| nButyric acid       | x                       | x                       |
| Valeric acid        | 784.52                  | 180.44                  |
| iButyric acid       | x                       | x                       |
| Lactic acid         | 192.00                  | 65.31                   |
| Hexanoic acid       | x                       | x                       |
| 2-Ethylbutyric acid | 621.25                  | 137.78                  |

### Oleic acid epoxidation

|                     | Temperature 60          | Temperature 80          |
|---------------------|-------------------------|-------------------------|
| Carboxylic acid     | TMR <sub>ad</sub> [min] | TMR <sub>ad</sub> [min] |
| Formic acid         | 8.78                    | 3.72                    |
| Acetic acid         | 386.30                  | 79.75                   |
| Propionic acid      | 766.57                  | 134.22                  |
| nButyric acid       | 1338.94                 | 177.34                  |
| Valeric acid        | x                       | x                       |
| iButyric acid       | 1857.91                 | 231.98                  |
| Lactic acid         | 80.83                   | 34.12                   |
| Hexanoic acid       | 961.25                  | 163.04                  |
| 2-Ethylbutyric acid | 2163.31                 | 293.58                  |

## Linoleic acid epoxidation

|                     | Temperature 60          | Temperature 80          |
|---------------------|-------------------------|-------------------------|
| Carboxylic acid     | TMR <sub>ad</sub> [min] | TMR <sub>ad</sub> [min] |
| Formic acid         | 8.30                    | 3.39                    |
| Acetic acid         | 162.90                  | 41.79                   |
| Propionic acid      | 522.88                  | 105.47                  |
| nButyric acid       | x                       | x                       |
| Valeric acid        | x                       | x                       |
| iButyric acid       | x                       | x                       |
| Lactic acid         | 98.44                   | 39.07                   |
| Hexanoic acid       | 680.93                  | 163.31                  |
| 2-Ethylbutyric acid | 1131.37                 | 156.89                  |

## -SI5 Parity plots

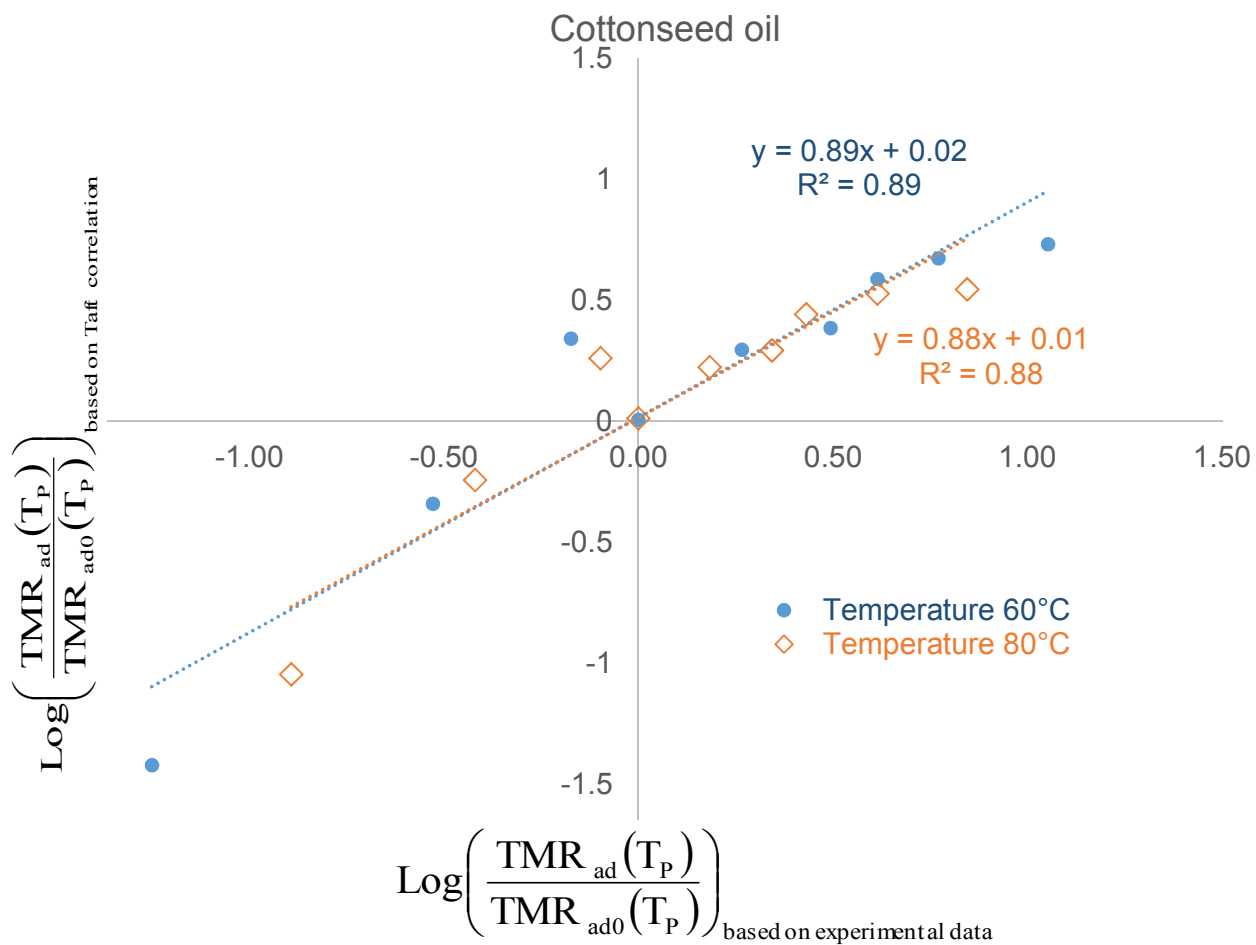

Figure S6. Parity plot for the epoxidation of cottonseed oil by using formic, acetic, propionic, n-butyric, valeric, i-butyric, lactic, hexanoic and 2-ethylbutyric acids.

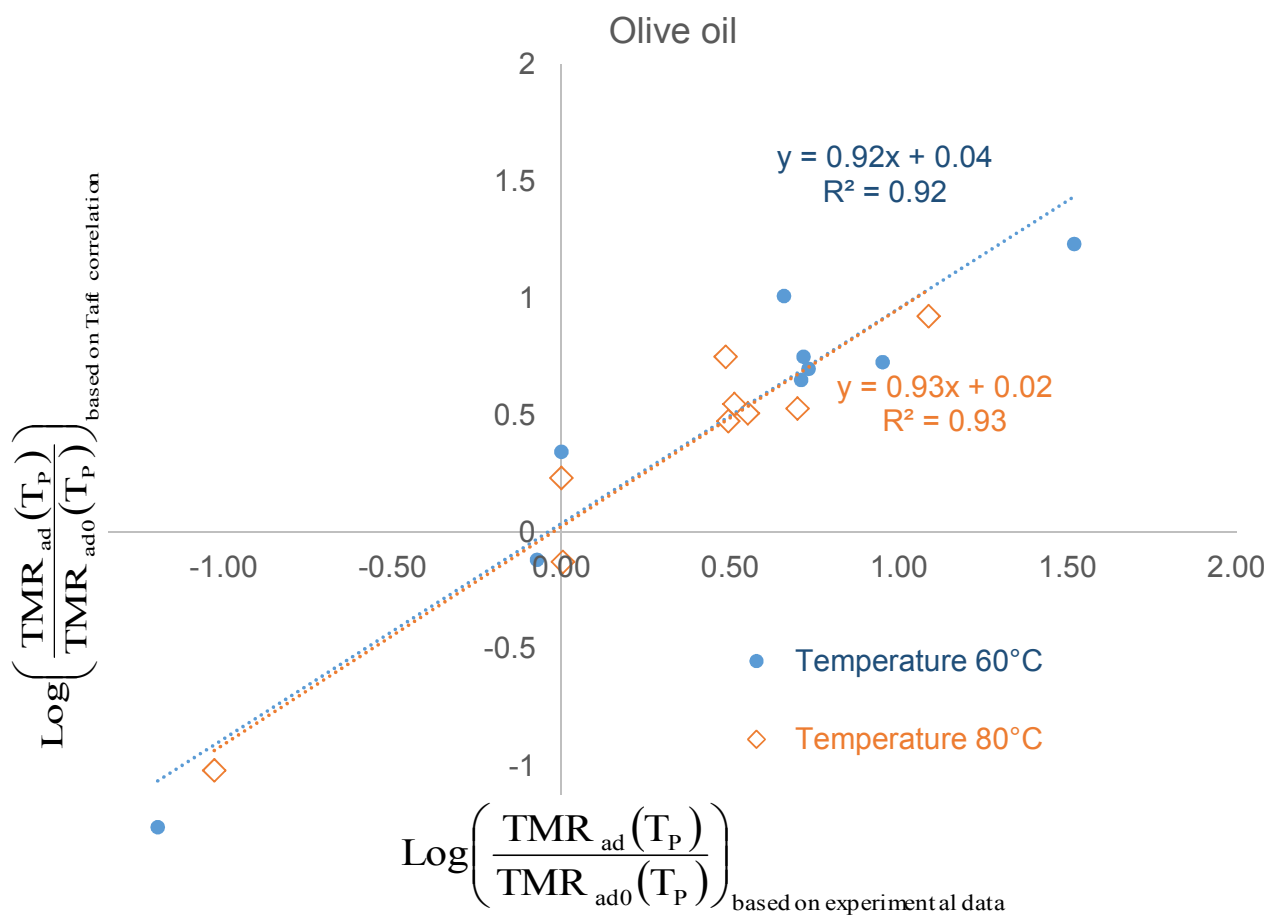

Figure S7. Parity plot for the epoxidation of olive oil by using formic, acetic, propionic, n-butyric, valeric, i-butyric, lactic, hexanoic and 2-ethylbutyric acids.



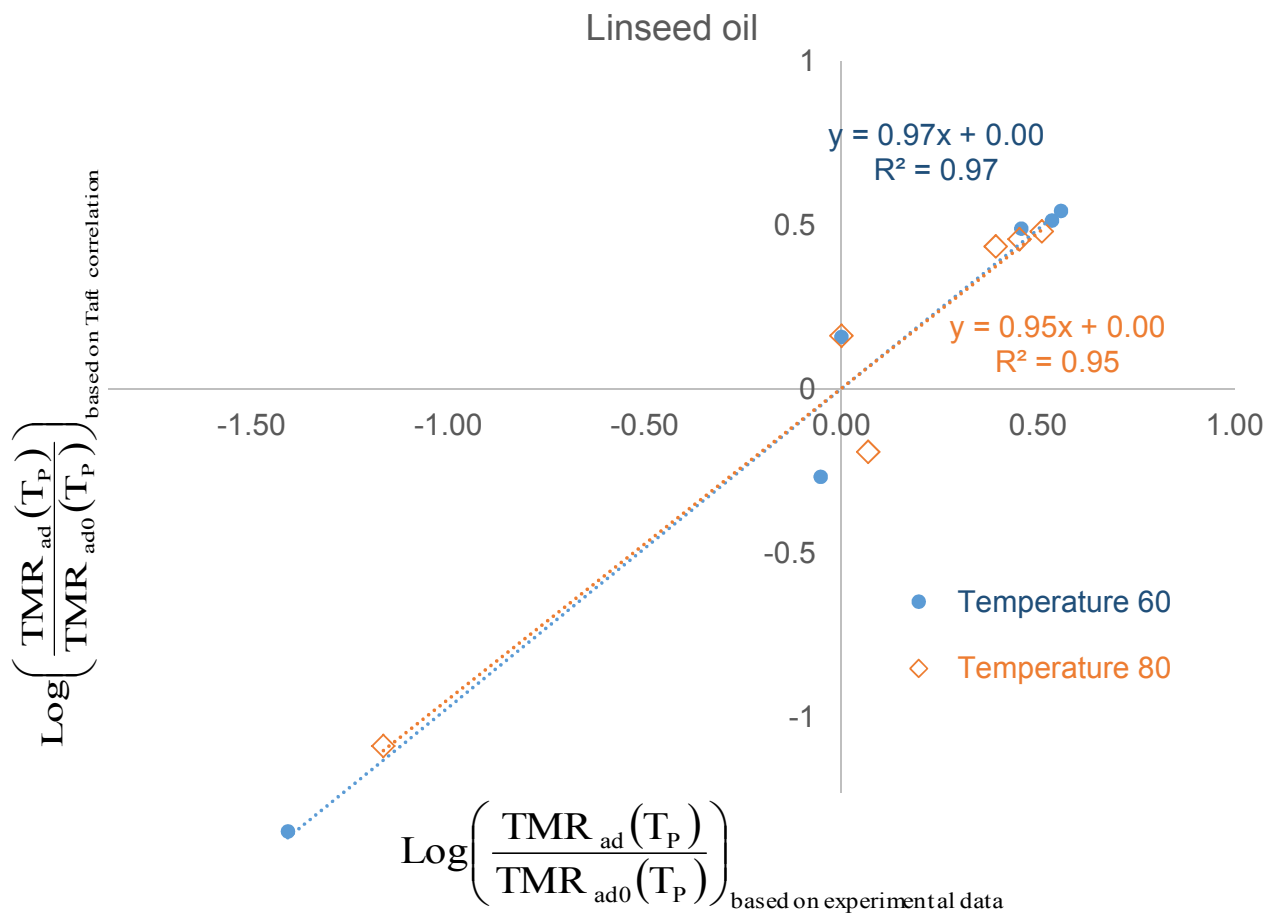

Figure S8. Parity plot for the epoxidation of linseed oil by using formic, acetic, propionic, valeric, lactic and 2-ethylbutyric acids.

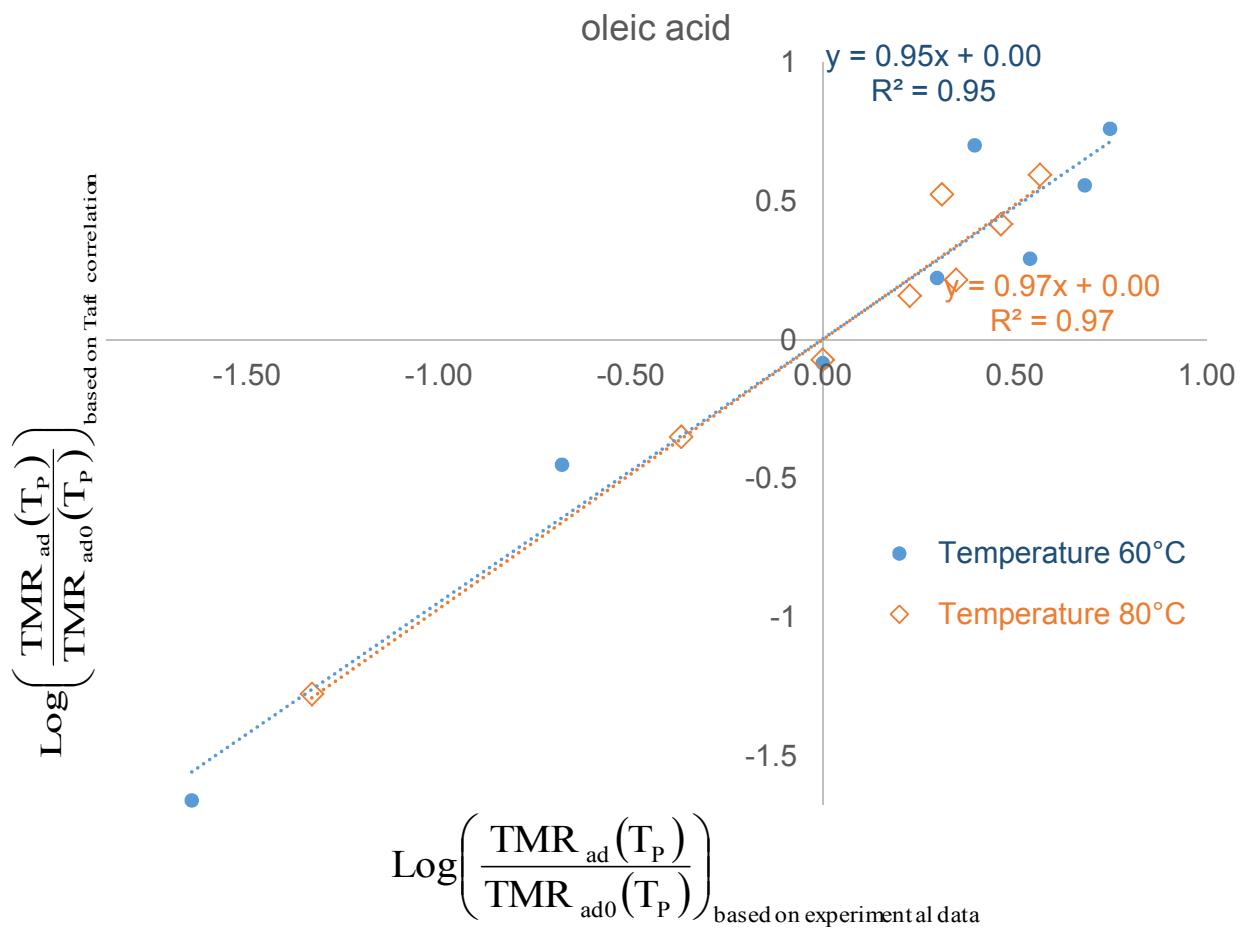

Figure S9. Parity plot for the epoxidation of oleic acid by using formic, acetic, propionic, n-butylric, i-butylric, lactic, hexanoic and 2-ethylbutylric acids.

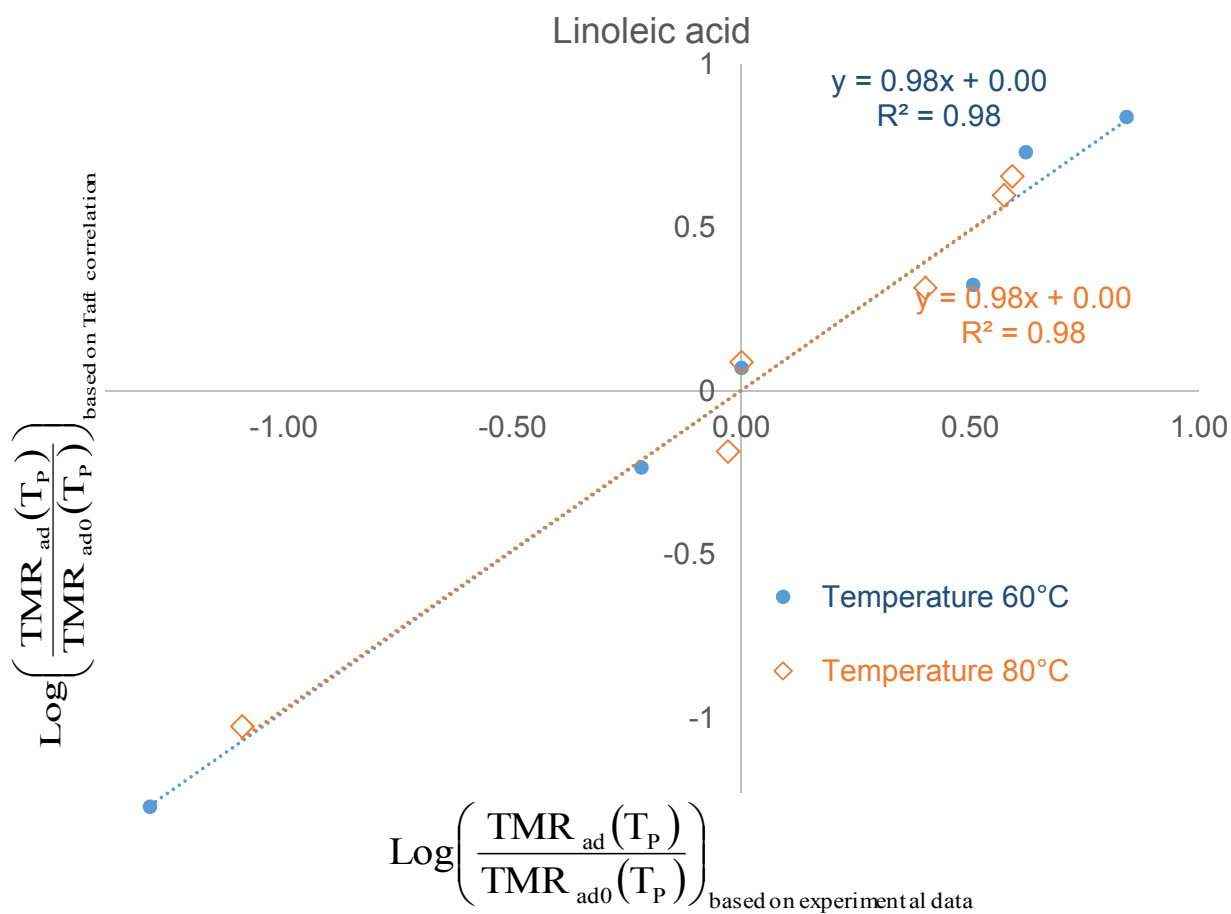

Figure S10. Parity plot for the epoxidation of linoleic acid by using formic, acetic, propionic, lactic, hexanoic and 2-ethylbutyric acids.

**-SI6 Experimental matrix for the different experiments**

|                | Nature of carboxylic acid | Amount of carboxylic acid (mol) | Amount of hydrogen peroxide (mol) | Amount of water (mol) | Mass of oil (gram) | Temperature ramp (°C/min) |
|----------------|---------------------------|---------------------------------|-----------------------------------|-----------------------|--------------------|---------------------------|
| COTTONSEED OIL | Formic acid               | 0.02                            | 0.03                              | 0.21                  | 3.16               | 3.00                      |
|                | Acetic acid               | 0.02                            | 0.03                              | 0.21                  | 3.12               | 2.95                      |
|                | Propionic acid            | 0.02                            | 0.03                              | 0.21                  | 3.13               | 2.65                      |
|                | n-Butyric acid            | 0.02                            | 0.03                              | 0.21                  | 3.16               | 2.90                      |
|                | Valeric acid              | 0.02                            | 0.03                              | 0.21                  | 3.18               | 2.37                      |
|                | iso-Butyric acid          | 0.02                            | 0.03                              | 0.21                  | 3.18               | 2.37                      |
|                | Lactic acid               | 0.02                            | 0.03                              | 0.22                  | 3.14               | 2.88                      |
|                | Hexanoic acid             | 0.02                            | 0.03                              | 0.21                  | 3.20               | 2.38                      |
|                | 2-ethyl butyric acid      | 0.02                            | 0.03                              | 0.21                  | 3.19               | 2.43                      |
|                |                           |                                 |                                   |                       |                    |                           |
| COTTONSEED OIL | Formic acid               | 0.03                            | 0.03                              | 0.22                  | 3.16               | 2.98                      |
|                | Acetic acid               | 0.03                            | 0.03                              | 0.20                  | 3.24               | 2.77                      |
|                | Propionic acid            | 0.03                            | 0.03                              | 0.22                  | 3.20               | 2.39                      |
|                | n-Butyric acid            | 0.03                            | 0.03                              | 0.21                  | 3.20               | 2.30                      |
|                | Valeric acid              | 0.02                            | 0.03                              | 0.22                  | 3.19               | 2.29                      |
|                | iso-Butyric acid          | 0.03                            | 0.03                              | 0.21                  | 3.18               | 2.26                      |
|                | Lactic acid               | 0.03                            | 0.03                              | 0.23                  | 3.19               | 2.12                      |
|                | Hexanoic acid             | 0.03                            | 0.03                              | 0.21                  | 3.19               | 2.39                      |
|                | 2-ethyl butyric acid      | 0.02                            | 0.03                              | 0.21                  | 3.18               | 2.32                      |

|             |                      |      |      |      |      |      |
|-------------|----------------------|------|------|------|------|------|
| LINSEED OIL | Formic acid          | 0.03 | 0.03 | 0.21 | 3.34 | 3.22 |
|             | Acetic acid          | 0.03 | 0.03 | 0.21 | 3.32 | 2.68 |
|             | Propionic acid       | 0.03 | 0.03 | 0.21 | 3.33 | 2.27 |
|             | n-Butyric acid       | X    | X    | X    | X    | X    |
|             | Valeric acid         | 0.02 | 0.03 | 0.21 | 3.28 | 3.38 |
|             | iso-Butyric acid     | X    | X    | X    | X    | X    |
|             | Lactic acid          | 0.03 | 0.03 | 0.21 | 3.28 | 2.76 |
|             | Hexanoic acid        | X    | X    | X    | X    | X    |
|             | 2-ethyl butyric acid | 0.03 | 0.03 | 0.22 | 3.30 | 2.93 |
| OLEIC ACID  | Formic acid          | 0.03 | 0.03 | 0.22 | 3.29 | 2.66 |
|             | Acetic acid          | 0.03 | 0.03 | 0.20 | 3.27 | 2.19 |
|             | Propionic acid       | 0.03 | 0.03 | 0.21 | 3.31 | 1.52 |
|             | n-Butyric acid       | 0.03 | 0.03 | 0.22 | 3.31 | 2.08 |
|             | Valeric acid         | X    | X    | X    | X    | X    |
|             | iso-Butyric acid     | 0.03 | 0.03 | 0.21 | 3.30 | 1.43 |
|             | Lactic acid          | 0.03 | 0.03 | 0.22 | 3.31 | 2.16 |
|             | Hexanoic acid        | 0.03 | 0.03 | 0.22 | 3.29 | 2.36 |
|             | 2-ethyl butyric acid | 0.03 | 0.03 | 0.21 | 3.30 | 2.64 |

|               |                      |      |      |      |      |      |
|---------------|----------------------|------|------|------|------|------|
| LINOLEIC ACID | Formic acid          | 0.03 | 0.03 | 0.21 | 3.29 | 2.66 |
|               | Acetic acid          | 0.03 | 0.03 | 0.20 | 3.28 | 2.48 |
|               | Propionic acid       | 0.03 | 0.03 | 0.21 | 3.31 | 2.09 |
|               | n-Butyric acid       | X    | X    | X    | X    | X    |
|               | Valeric acid         | X    | X    | X    | X    | X    |
|               | iso-Butyric acid     | X    | X    | X    | X    | X    |
|               | Lactic acid          | 0.03 | 0.03 | 0.22 | 3.26 | 2.10 |
|               | Hexanoic acid        | 0.03 | 0.03 | 0.22 | 3.33 | 2.16 |
|               | 2-ethyl butyric acid | 0.03 | 0.03 | 0.21 | 3.28 | 2.40 |
